# Supplementary material for: Structured hydroxyapatite composites as efficient solid base catalysts for condensation reactions
Source: Royal Society of Chemistry journal article supplement (doi:10.1039/d1cy00102g), 2021-01-01
Supplement: d1cy00102g1.pdf [file d1cy00102g1.pdf]

## Supplementary Information

### Structured hydroxyapatite composites as efficient solid base catalysts for condensation reactions

Tharun Jose, Jamal Ftouni and Pieter C. A. Bruijninx\*

**Table S1.** Phase composition based on quantitative Rietveld analysis of the SHC samples.

| Samples | Calcite<br>(CaCO <sub>3</sub> ) | Hydroxyapatite<br>(Ca <sub>5</sub> (PO <sub>4</sub> ) <sub>3</sub> (OH)) | Octa-Ca Phos.<br>(Ca <sub>8</sub> H <sub>2</sub> (PO <sub>4</sub> ) <sub>6</sub> ·5H <sub>2</sub> O) | Total |
|---------|---------------------------------|--------------------------------------------------------------------------|------------------------------------------------------------------------------------------------------|-------|
| SHC-1   | 79                              | 21                                                                       | -                                                                                                    | 100   |
| SHC-2   | 50                              | 50                                                                       | -                                                                                                    | 100   |
| SHC-3   | 15                              | 85                                                                       | -                                                                                                    | 100   |
| SHC-4   | 14                              | 86                                                                       | -                                                                                                    | 100   |
| SHC-5   | 11                              | 79                                                                       | 10                                                                                                   | 100   |

Data were normalized to 100% crystalline material; Octa-Ca Phos. = Octacalcium phosphate.

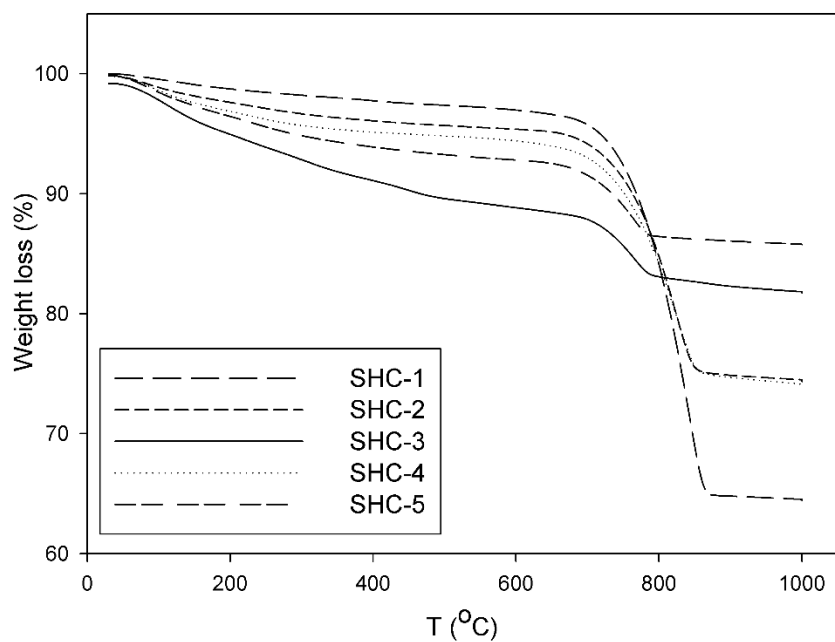

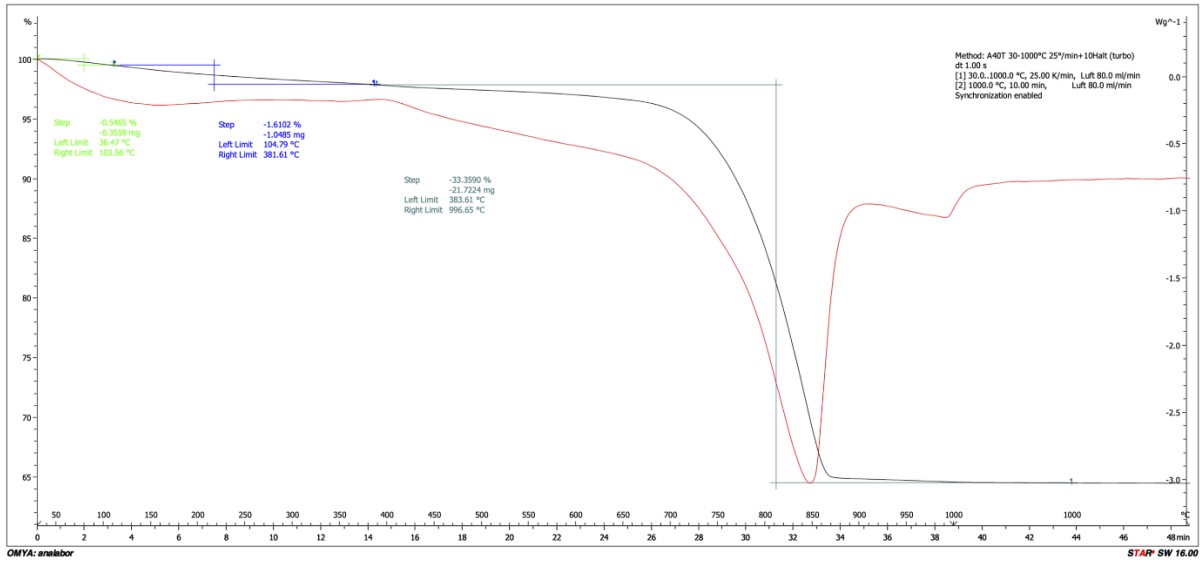

SHC-1

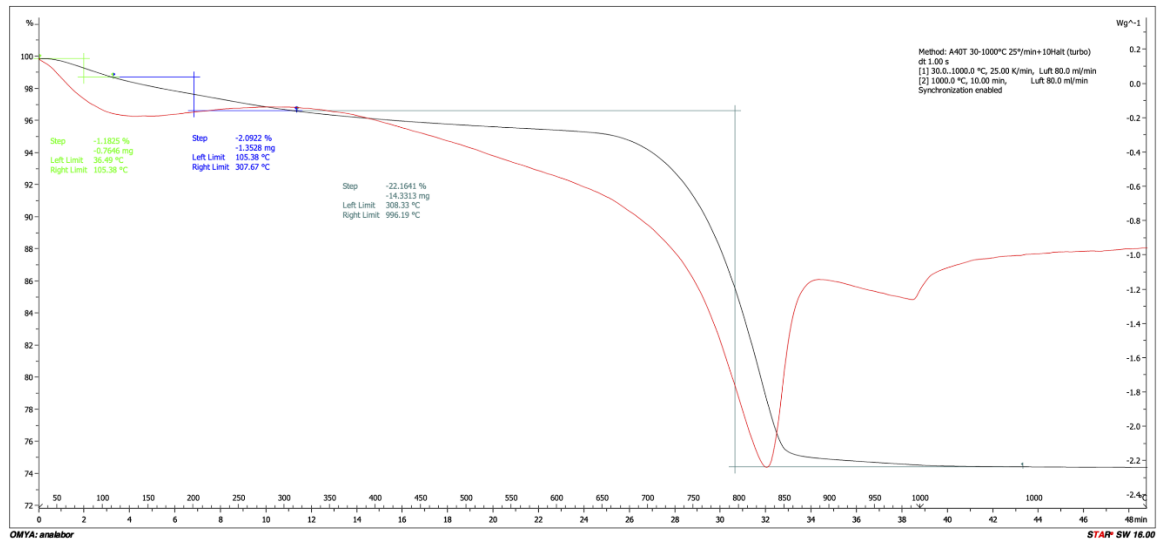

SHC-2

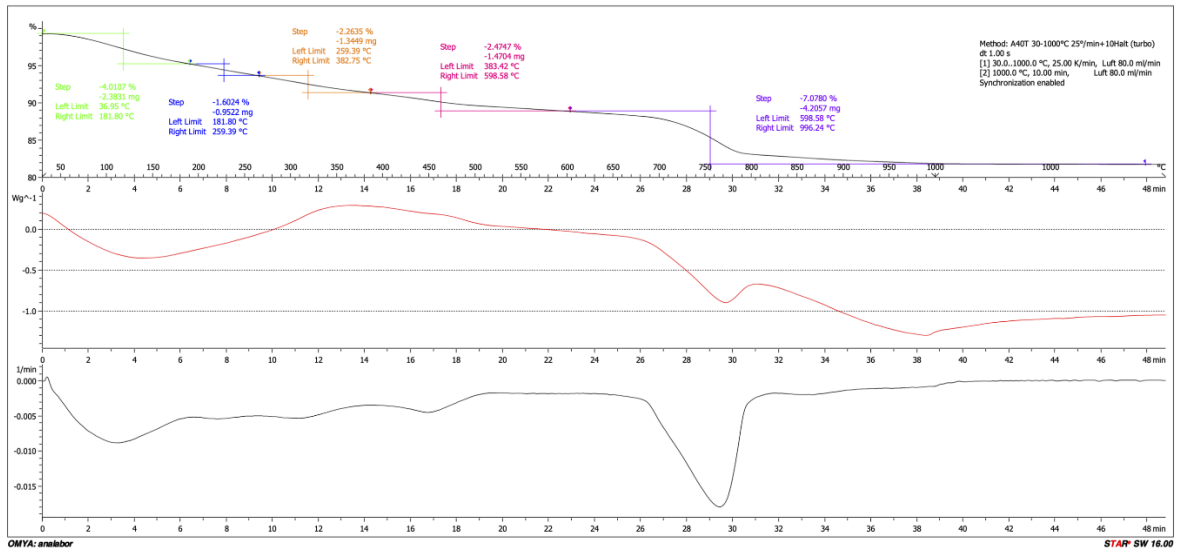

SHC-3

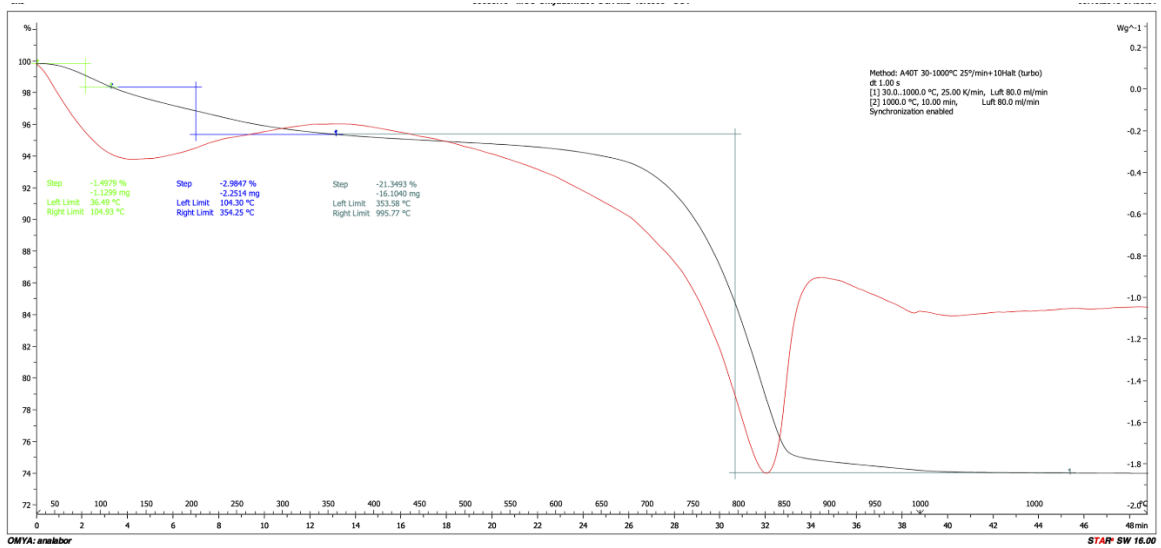

SHC-4

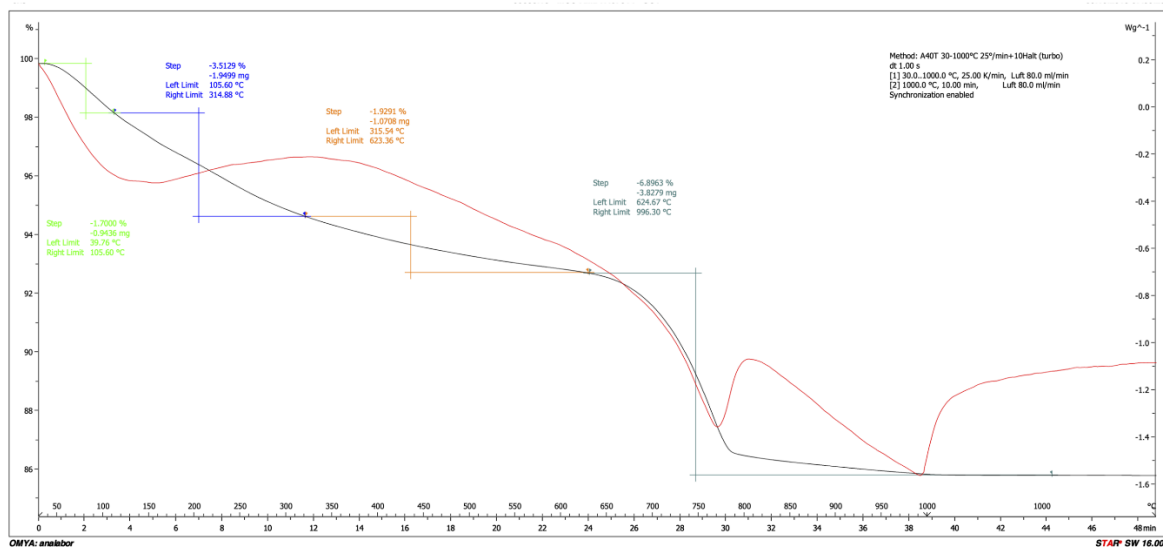

SHC-5

Figure S1. Thermal analysis- TGA/DSC curves of the SHC samples.

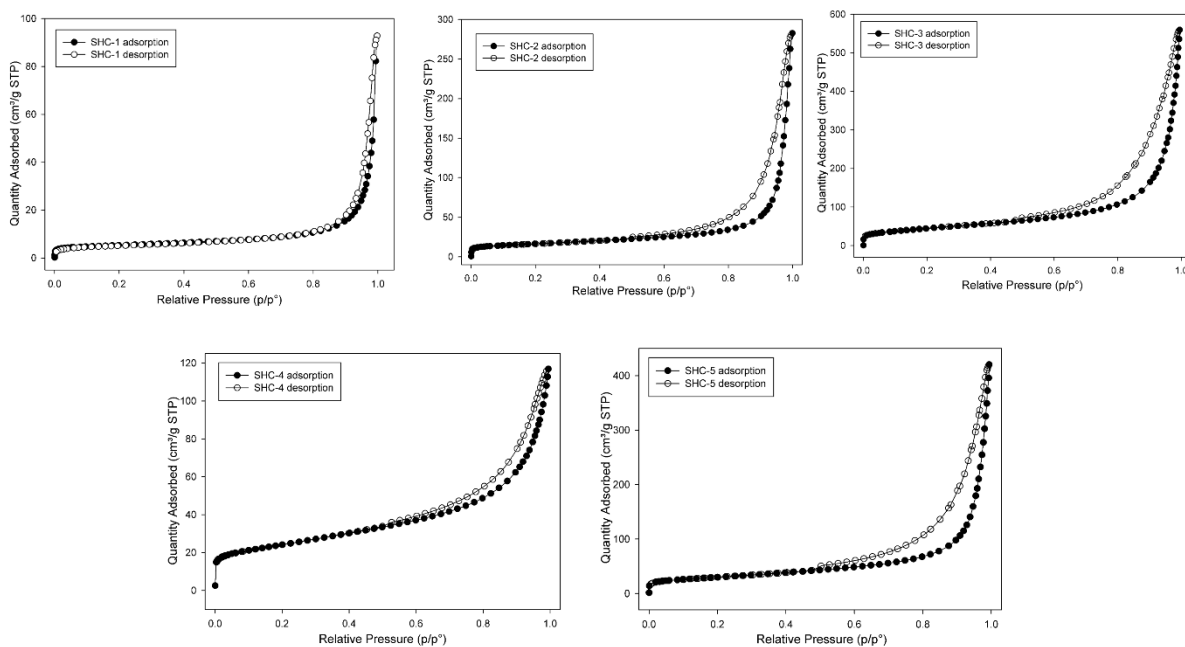

Figure S2. The nitrogen adsorption/desorption isotherm plots for the SHC catalysts.

**Table S2.** Literature survey of various catalysts employed for the self-aldol condensation reactions.

| Entry | Catalyst                                         | Cat. amount (g) | Cat. Loading (mol%) | Aldehyde       | Temp. (°C) | Time (h) | Conversion (%) | Reference |
|-------|--------------------------------------------------|-----------------|---------------------|----------------|------------|----------|----------------|-----------|
| 1     | SFIL                                             |                 | 10                  | Butyraldehyde  | 120        | 6        | 89.4           | 1         |
| 2     | MOS2                                             | 0.1             | -                   | Butyraldehyde  | 100        | 10       | 83             | 2         |
| 3     | Amino functionalized chitosan                    | 0.05            | -                   | Butyraldehyde  | 100        | 8        | 96             | 3         |
| 4     | Nb <sub>2</sub> O <sub>5</sub>                   | 2               | -                   | Butyraldehyde  | 200        | 5        | 48.5           | 4         |
| 5     | SiO <sub>2</sub> -Al <sub>2</sub> O <sub>3</sub> | 2               | -                   | Butyraldehyde  | 200        | 5        | 29.3           | 4         |
| 6     | MgO-ZrO <sub>2</sub>                             |                 | 10                  | Cyclopentanone | 130        | 6        | 84             | 5         |
| 7     | CaC <sub>2</sub>                                 | 4               | 36                  | Acetone        | 130        | 10       | >90            | 6         |
| 8     | Ce-MgAl-Hydrotalcite                             | 0.5             | -                   | Acetone        | 0          | 6        | 20             | 7         |

SFIL = [HSO<sub>3</sub>-b-N(ET)<sub>3</sub>]p-TSA; MOS2 = MgCl<sub>2</sub>.6H<sub>2</sub>O + APTMS; Solvent-free conditions; Cat. = Catalyst; Temp. = Temperature.

**Table S3.** Self-aldol condensation reaction of butyraldehyde based upon catalyst weight percentage loading.

| Entry | Catalyst | Time (h) |       |       |       |       |       |
|-------|----------|----------|-------|-------|-------|-------|-------|
|       |          | 2        |       | 6     |       | 22    |       |
|       |          | X (%)    | Y (%) | X (%) | Y (%) | X (%) | Y (%) |
| 1     | SHC-3    | 67       | 67    | 91    | 89    | 100   | 98    |
| 2     | HAP-H    | 10       | 10    | 53    | 53    | 70    | 68    |

*Reaction conditions:* Temperature = 130 °C; Catalyst loading = 17 wt.%; X = conversion, Y = yield, Results from NMR; IS = Mesitylene; HAP = Hydroxyapatite.

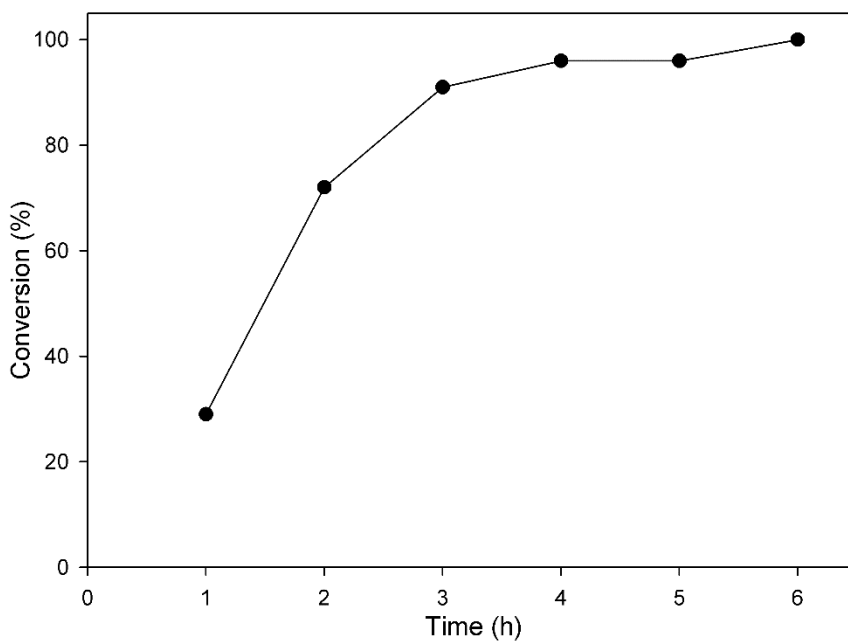

**Figure S3.** Dependence of butyraldehyde conversion on reaction time.

*Reaction conditions:* Catalyst = SHC-3; Catalyst loading = 3 mol%; Temperature = 130 °C; Selectivity at 1 h and 2 h  $\geq$  99%, from 3 h to 6 h = 97%; Results from NMR; IS = Mesitylene.

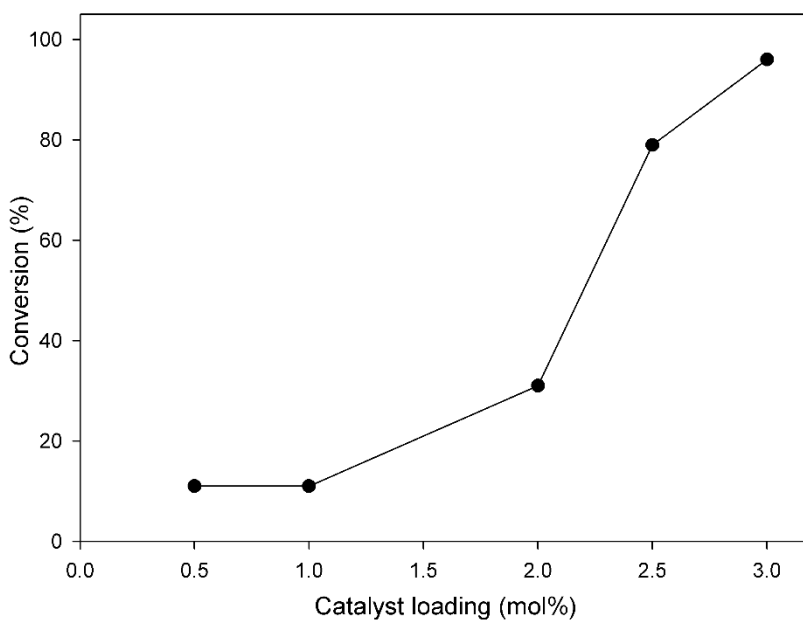

**Figure S4.** Dependence of Butyraldehyde conversion on catalyst loading.

*Reaction conditions:* Catalyst = SHC-3; Temperature = 130 °C; Time = 4 h; Selectivity from 0.5 to 2 mol%  $\geq$  99%, 2.5 mol% = 98%, 3 mol% = 97%; Results from NMR; IS = Mesitylene.

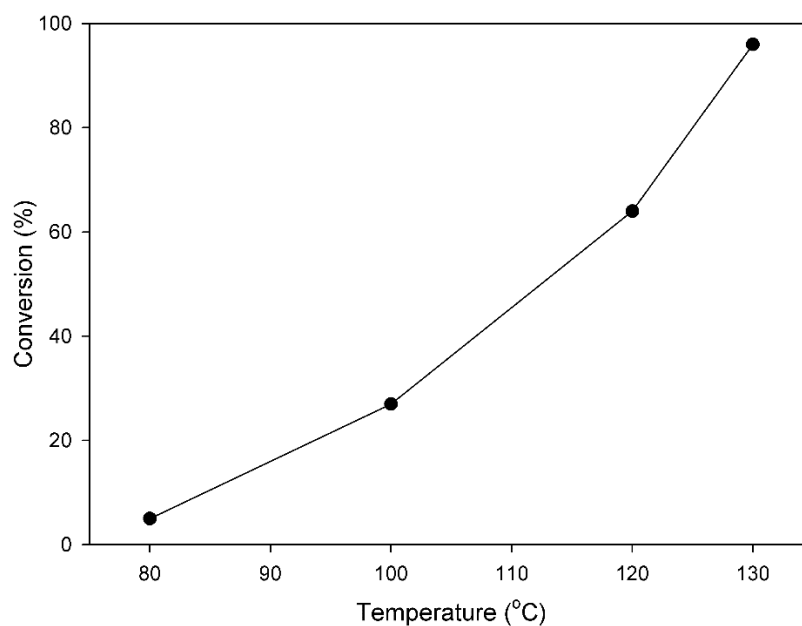

**Figure S5.** Dependence of Butyraldehyde conversion on reaction temperature.

*Reaction conditions:* Catalyst = SHC-3; Catalyst loading = 3 mol%; Reaction time = 4 h; Selectivity from 80 to 100 °C  $\geq$  99%, for 110 and 120 °C = 98%, 130 °C = 97%; Results from NMR, IS = Mesitylene.

**Table S4.** Number of acidic and basic sites as determined by  $\text{NH}_3$  and  $\text{CO}_2$ -TPD, respectively.

| Entry | Catalyst | $\text{CO}_2$ -TPD             |        |       | $\text{NH}_3$ -TPD              |        |       |
|-------|----------|--------------------------------|--------|-------|---------------------------------|--------|-------|
|       |          | Number of basic sites (mmol/g) |        |       | Number of acidic sites (mmol/g) |        |       |
|       |          | Weak                           | Medium | Total | Weak                            | Medium | Total |
| 1     | SHC-1    | 0.05                           | -      | 0.05  | -                               | 0.03   | 0.03  |
| 2     | SHC-2    | 0.01                           | 0.07   | 0.08  | -                               | 0.09   | 0.09  |
| 3     | SHC-3    | 0.05                           | 0.28   | 0.33  | -                               | 0.19   | 0.19  |
| 4     | SHC-4    | 0.08                           | 0.07   | 0.15  | -                               | 0.13   | 0.13  |
| 5     | SHC-5    | 0.03                           | 0.05   | 0.08  | -                               | 0.12   | 0.12  |
| 6     | HAP-L    | 0.06                           | -      | 0.06  | -                               | 0.02   | 0.02  |
| 7     | HAP-H    | 0.02                           | 0.11   | 0.13  | -                               | 0.11   | 0.11  |

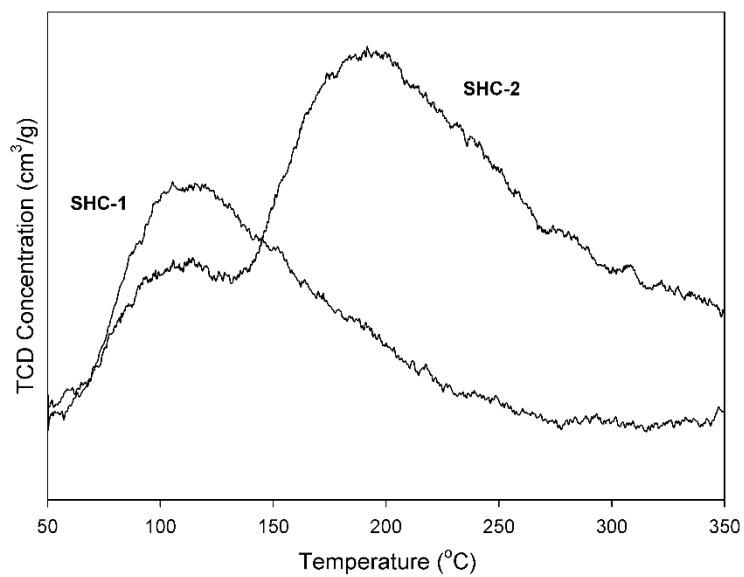

**Figure S6.** CO<sub>2</sub>-TPD curves for the SHC-1 and SHC-2 catalysts.

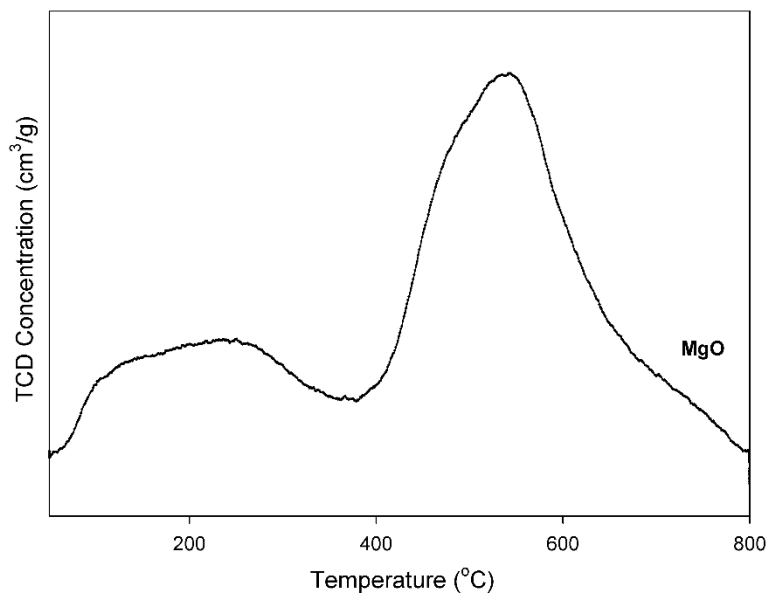

**Figure S7.** CO<sub>2</sub>-TPD curves for MgO. Total number of basic sites: 0.97 mmol/g.



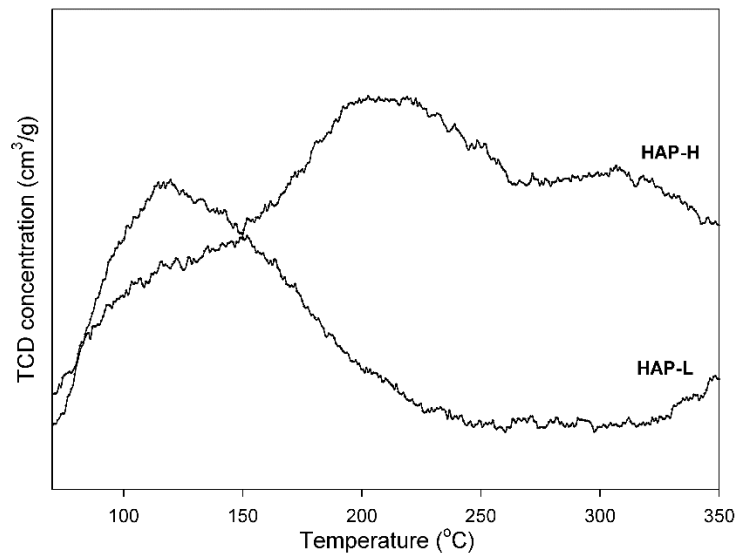

**Figure S8.** CO<sub>2</sub>-TPD curves for HAP-H and HAP-L.

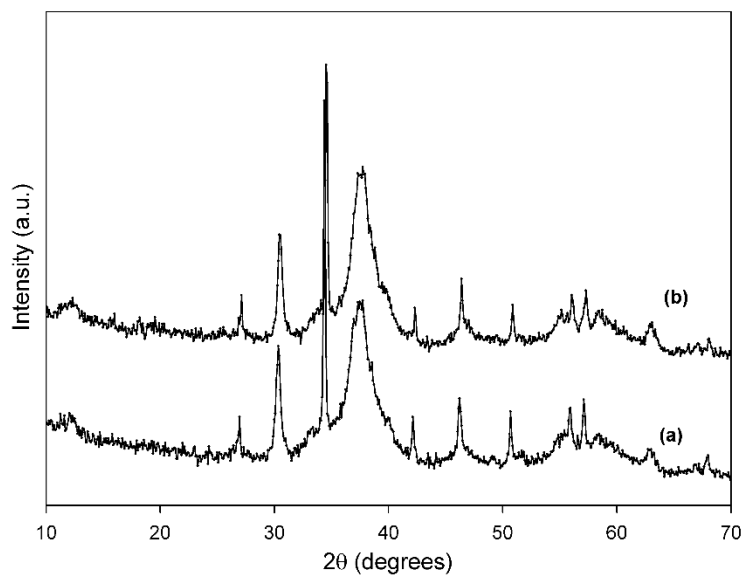

**Figure S9.** XRD structures for the fresh and recycled SHC-3 catalyst (entry 1, Table 5). (a) fresh, (b) after 1<sup>st</sup> recycle.

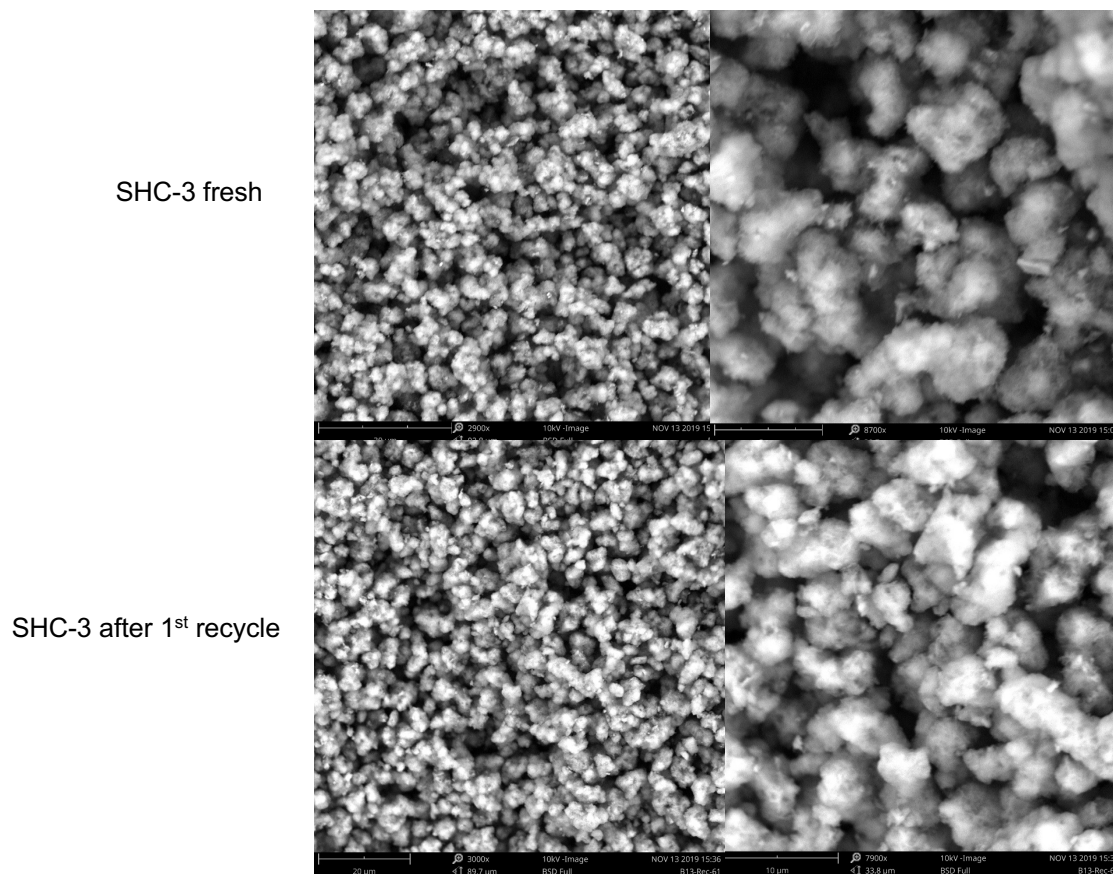

**Figure S10.** SEM images for the fresh and recycled SHC-3 catalyst (entry 1, Table 5).

**Table S5.** ICP and elemental analysis for SHC-3 catalyst (entry1, Table 5).

| Entry | Run                           | ICP-OES  |         |            | EA      |
|-------|-------------------------------|----------|---------|------------|---------|
|       |                               | Ca (wt%) | P (wt%) | Ca/P ratio | C (wt%) |
| 1     | 1 (Fresh)                     | 40.67    | 6.34    | 4.95       | 3.8     |
| 2     | after 1 <sup>st</sup> recycle | 38.84    | 5.75    | 5.10       | 6.9     |
| 3     | Filtrate                      | -        | -       | -          | n.d.    |

Filtrate = from entry1, table 5 after 1<sup>st</sup> recycle; n.d. = not determined.

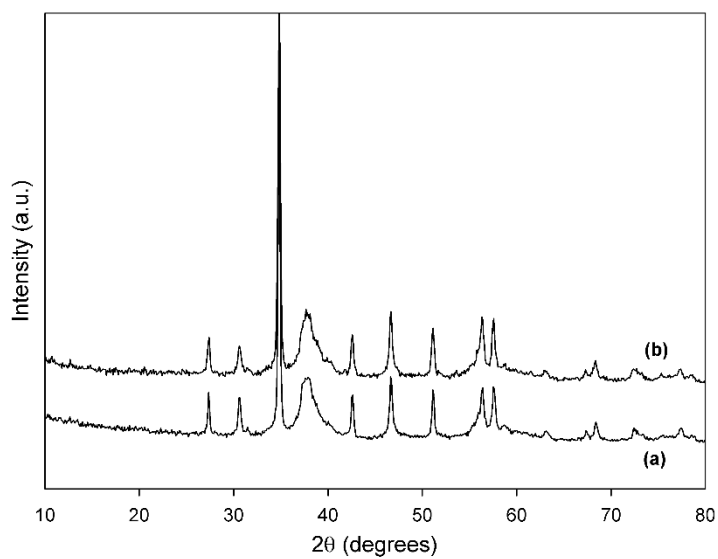

**Figure S11.** XRD structures for the fresh and recycled SHC-4 catalysts (entry 3, Table 5). (a) = fresh, (b) = after 4<sup>th</sup> recycle.

**Table S6.** BET analysis and CO<sub>2</sub>-TPD for the fresh and recycled catalysts (entry 1 and 3, Table 5).

| Entries from Table 5 | Run                           | SHC   | BET (m <sup>2</sup> /g) | CO <sub>2</sub> -TPD Total number of basic sites (mmol/g) |
|----------------------|-------------------------------|-------|-------------------------|-----------------------------------------------------------|
| 1                    | 1 (Fresh)                     |       | 160.3                   | 0.33                                                      |
|                      | after 4 <sup>th</sup> recycle | SHC-3 | 125.3                   | 0.05                                                      |
| 3                    | 1 (Fresh)                     |       | 85.5                    | 0.15                                                      |
|                      | after 4 <sup>th</sup> recycle | SHC-4 | 67.2                    | 0.08                                                      |

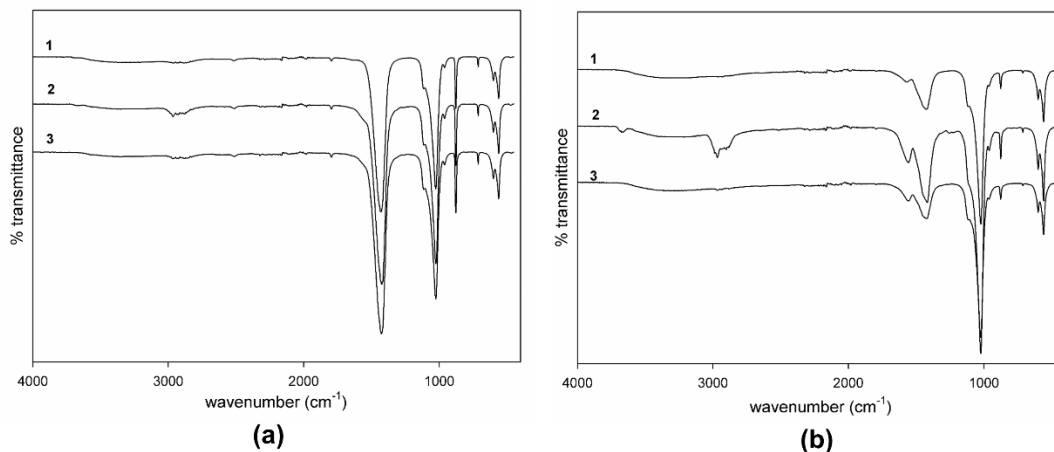

**Figure S12.** FT-IR for the fresh and recycled SHC catalysts: (a) SHC-4 and (b) SHC-3. (1) Fresh, (2) after 1<sup>st</sup> recycle and (3) after 4<sup>th</sup> recycle.

### E1. Adsorbed Ammonia and Adsorbed Carbon Dioxide Temperature Programmed Desorption (NH<sub>3</sub>-TPD and CO<sub>2</sub>-TPD)

The measurements were performed using a Micromeritics ASAP2920 apparatus. 0.1 g of sample was dried in situ under an He flow with a temperature ramp of 5 °C min<sup>-1</sup> up to 400 °C.

For the NH<sub>3</sub>-TPD measurements, the sample was cooled to 100 °C. At this point, 20 pulses of 5 cm<sup>3</sup> 10 vol.-% NH<sub>3</sub> in He were dosed over the sample (corresponding to an NH<sub>3</sub> flow of 25.3 cm<sup>3</sup> min<sup>-1</sup>). The sample was then heated to 600 °C with a ramp of 5 °C min<sup>-1</sup> to induce desorption of NH<sub>3</sub>. The amount of NH<sub>3</sub> desorbed over time was determined using a thermal conductivity detector (TCD). The TCD concentration was plotted over time for the quantitative evaluation and over temperature to determine the temperature position of the desorption peaks. In both cases, a peak deconvolution was performed. To obtain the total amount of desorbed NH<sub>3</sub>, a baseline subtraction and full integration of the desorption feature has been performed. Peak deconvolution was performed using the software Fityk.

After obtaining the area under the curve (AUC, A) (from Fityk), the AUC is converted into a quantifiable amount of NH<sub>3</sub> (n<sub>NH<sub>3</sub></sub> in mmol/g) using the below formulae:

$$A_r = A / 100 \%$$

$$V_{\text{NH}_3, \text{abs}} = A_r \cdot V$$

$$V_{\text{NH}_3} = V_{\text{NH}_3, \text{abs}} / m_{\text{sample}}$$

$$m_{\text{NH}_3} = V_{\text{NH}_3} \cdot \rho_{\text{NH}_3}$$

$$n_{\text{NH}_3} = m_{\text{NH}_3} / M_{\text{NH}_3}$$

$$\rho_{\text{NH}_3} = 0.76 \text{ kg/m}^3, M_{\text{NH}_3} = 17 \text{ g/mol}$$

A = obtained Area (% • min), A<sub>r</sub> = Area (min), V = Flow 25.2 (cm<sup>3</sup> / min)

V<sub>NH<sub>3</sub>,abs</sub> = absolute amount of desorbed NH<sub>3</sub> (cm<sup>3</sup>)

V<sub>NH<sub>3</sub></sub> = amount of desorbed NH<sub>3</sub> per g of sample (cm<sup>3</sup> / g)

For the CO<sub>2</sub>-TPD measurements, the sample was cooled to 50 °C and a procedure similar to the one described for NH<sub>3</sub>-TPD was employed. The number of basic sites was determined according to the calculation above, using the values  $\rho_{\text{CO}_2} = 1.98 \text{ kg/m}^3$  and  $M_{\text{CO}_2} = 44.01 \text{ g/mol}$ . For calculating the number of acidic or basic sites, it was assumed that only one molecule of NH<sub>3</sub> or CO<sub>2</sub> can adsorb on a single site.

## References

1. X. Zhang, H. An, H. Zhang, X. Zhao, Y. Wang, *Ind. Eng. Chem. Res.*, 2014, 53, 16707.
2. H. A. Patel, S. K. Sharma, R. V. Jasra, *J. Mol. Catal. A: Chem.*, 2008, 286, 31.
3. T. Jose, N. Sudheesh, R. S. Shukla, *J. Mol. Catal. A: Chem.*, 2010, 333, 158.
4. D. Sun, S. Moriya, Y. Yamada, S. Sato, *Appl. Catal. A: Gen.*, 2016, 524, 8.
5. D. Liang, G. Li, Y. Liu, J. Wu, X. Zhang, *Catal. Commun.*, 2016, 81, 33.
6. X. Xu, H. Meng, Y. Lub, C. Li, *RSC Adv.*, 2018, 8, 30610.
7. Z. Wang, P. Fongarland, G. Lu, N. Essayem, *J. Catal.*, 2014, 318, 108.
